# Supplementary material for: A methionine-based turn-on chemical sensor for selectively monitoring Hg2+ ions in 100% aqueous solution
Source: Royal Society of Chemistry journal article supplement (doi:10.1039/c0ob00780c), 2011-01-01
Supplement: c0ob00780c.pdf [file c0ob00780c.pdf]

**Methionine-based turn-on chemical sensor for monitoring Hg(II) ions in 100%  
aqueous solution**

Mi-Hwa Yang, Chuda Raj Lohani, Hyeongjin Cho, and Keun-Hyeung Lee\*

**Supplementary Information**

*Bioorganic Chemistry Lab, Department of Chemistry, Inha University,*

*253-Yunghyun-dong, Nam-gu, Incheon, 402-751, South Korea*

| Table of Contents                                                                                 | Page |
|---------------------------------------------------------------------------------------------------|------|
| 1. Figure S1 HPLC chromatogram of <b>Dansyl-Met</b> .....                                         | 2    |
| 2. Figure S2 ESI-Mass of <b>Dansyl-Met</b> .....                                                  | 3    |
| 3. Figure S3 Emission spectra of <b>Dansyl-Met</b> (5 $\mu$ M).....                               | 4    |
| 4. Figure S4 A Job plot for <b>Dansyl-Met</b> (10 $\mu$ M) in 10mM HEPES buffer .....             | 5    |
| 5. Figure S5 Isothermal calorimetry titration curves of <b>Dansyl-Met</b> with Hg(II).....        | 6    |
| 6. Figure S6 Titration curve with Hg(II) in 50% CH <sub>3</sub> CN/buffer solution.....           | 7    |
| 7. Figure S7 Titration curve with Hg(II) in 100% CH <sub>3</sub> CN.....                          | 8    |
| 8. Figure S8 Emission spectra of <b>Dansyl-Met</b> in 10% CH <sub>3</sub> CN/buffer solution..... | 9    |
| 9. Figure S9 ESI-Mass of <b>Dansyl-Met</b> with Hg(II) .....                                      | 10   |
| 10. Figure S10 <sup>1</sup> H NMR spectra for <b>Dansyl-Met</b> .....                             | 12   |
| 11. Figure S11 <sup>13</sup> C NMR spectra for <b>Dansyl-Met</b> .....                            | 13   |
| 12. Figure S12 <sup>1</sup> H NMR spectra of <b>Dansyl-Met</b> with Hg(II) .....                  | 14   |
| 13. Figure S13 UV data of <b>Dansyl-Met</b> .....                                                 | 15   |

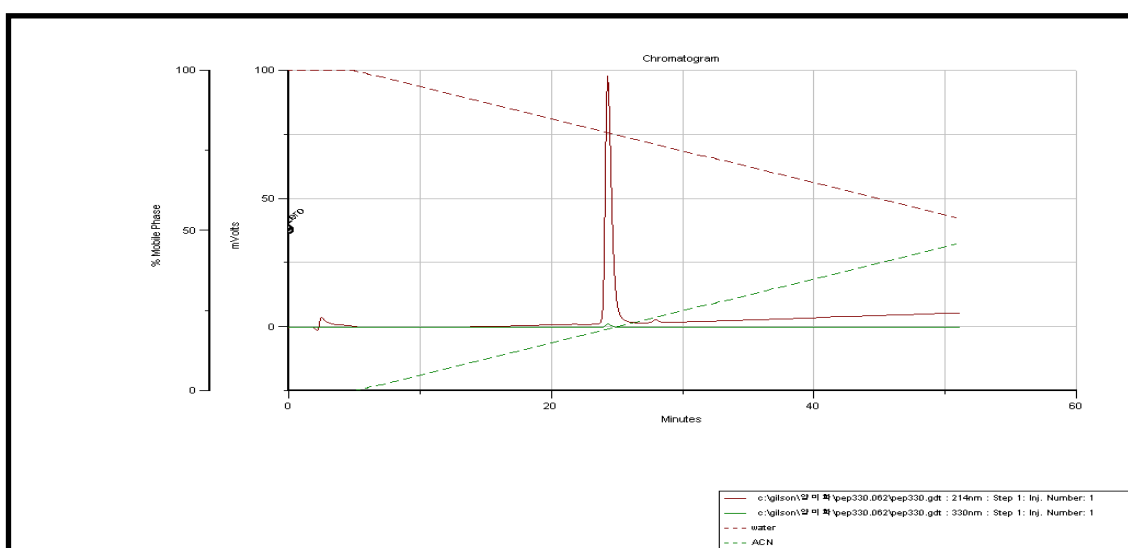

Figure S1. HPLC Chromatogram of **Dansyl-Met**

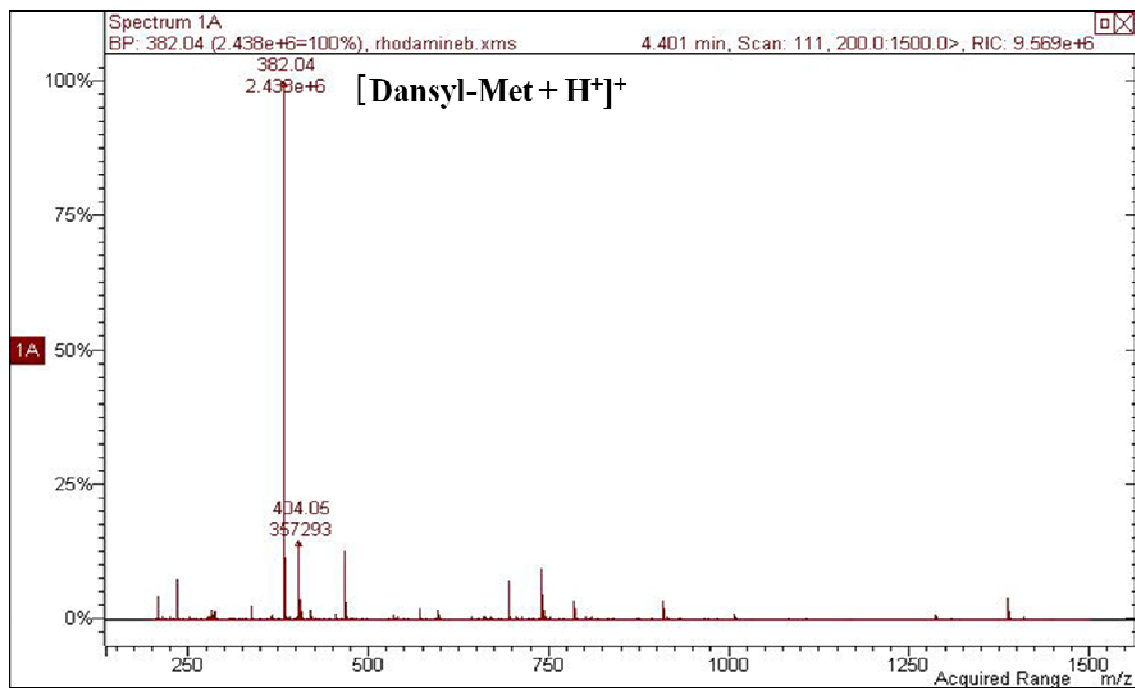

Figure S2. ESI-mass of **Dansyl-Met**

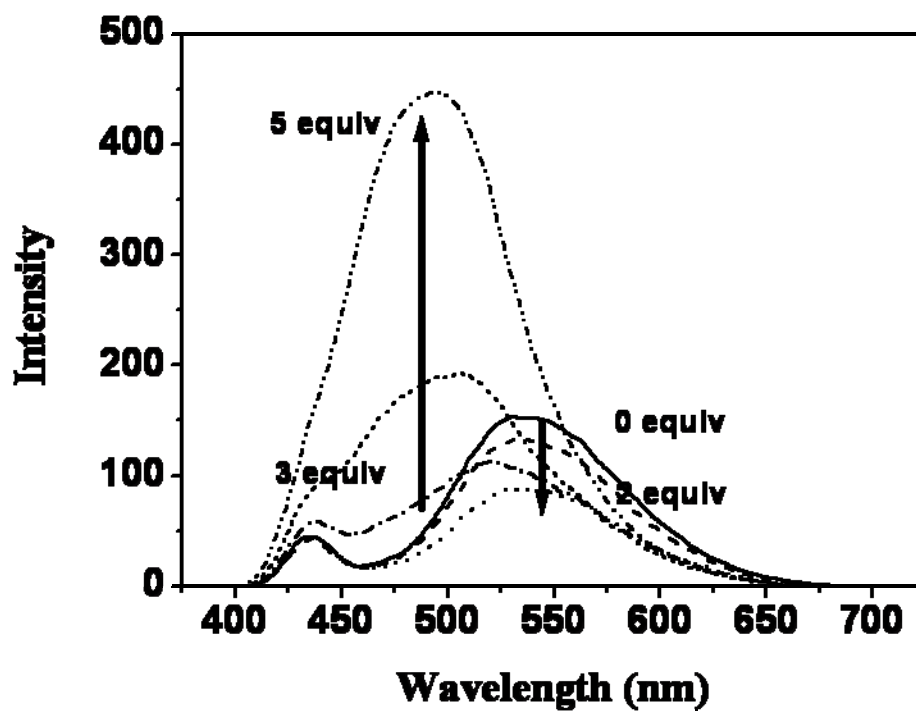

Figure S3. Emission spectra of **Dansyl-Met** (5 μM) in the presence of increasing concentration of Hg (II) (0, 1, 2, 3, 4, and 5 equiv) in 10 mM HEPES buffer solution at pH 7.4

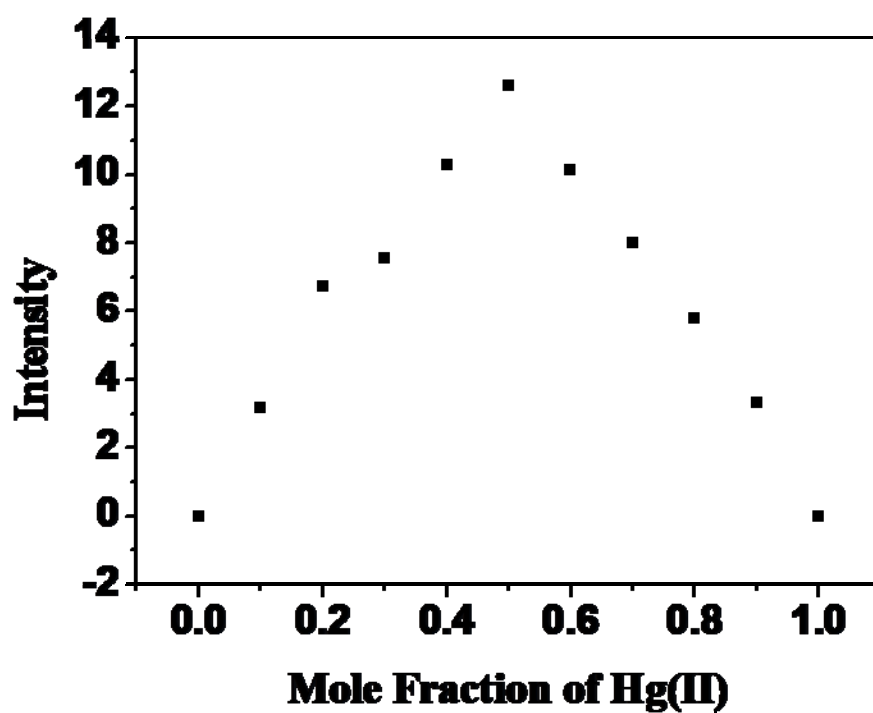

Figure S4. A Job plot for **Dansyl-Met**.

The concentration of **Dansyl-Met** and Hg(II) was 10  $\mu$ M in 10mM HEPES buffer (pH 7.4)

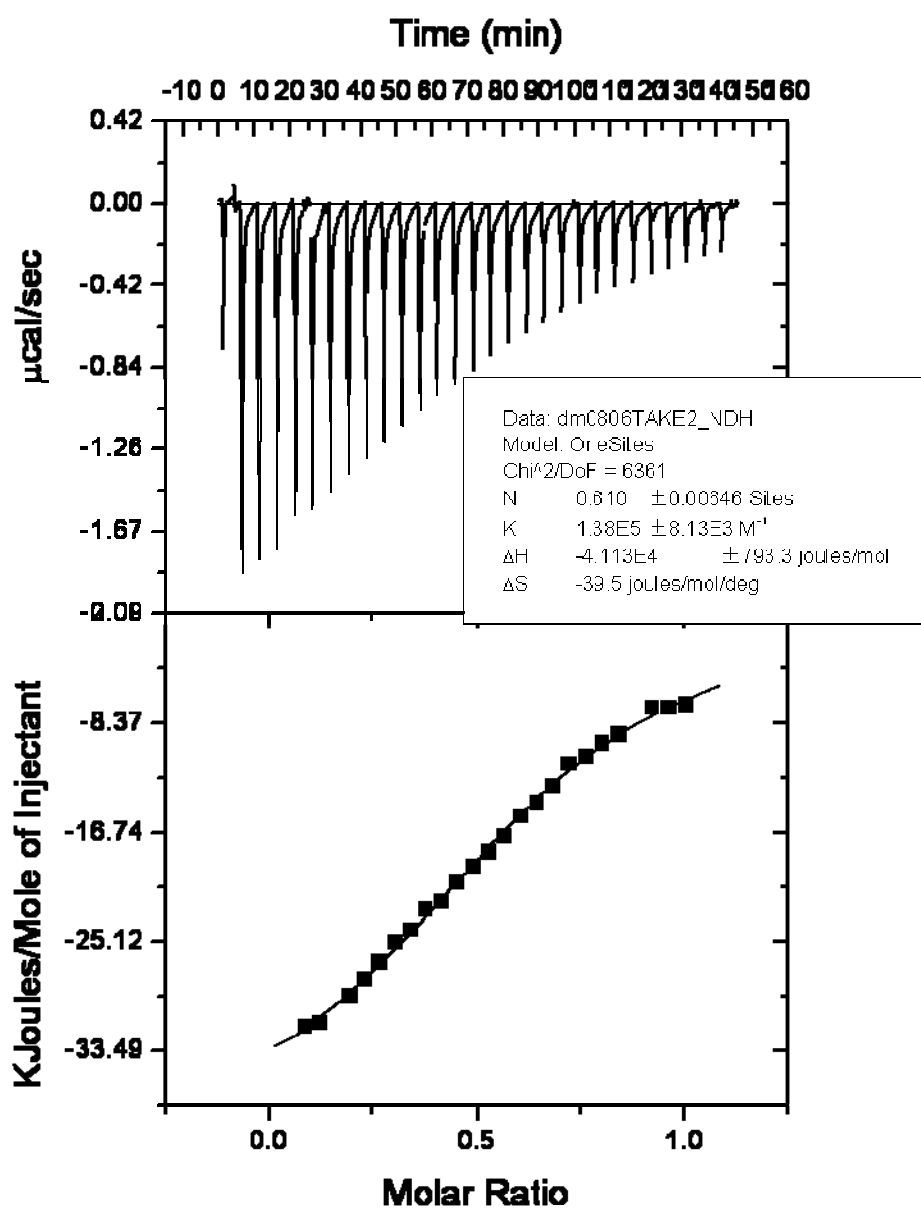

Figure S5. Isothermal calorimetry titration of **Dansyl-Met** (200  $\mu\text{M}$ ) in 10 mM HEPES buffer pH 7.4

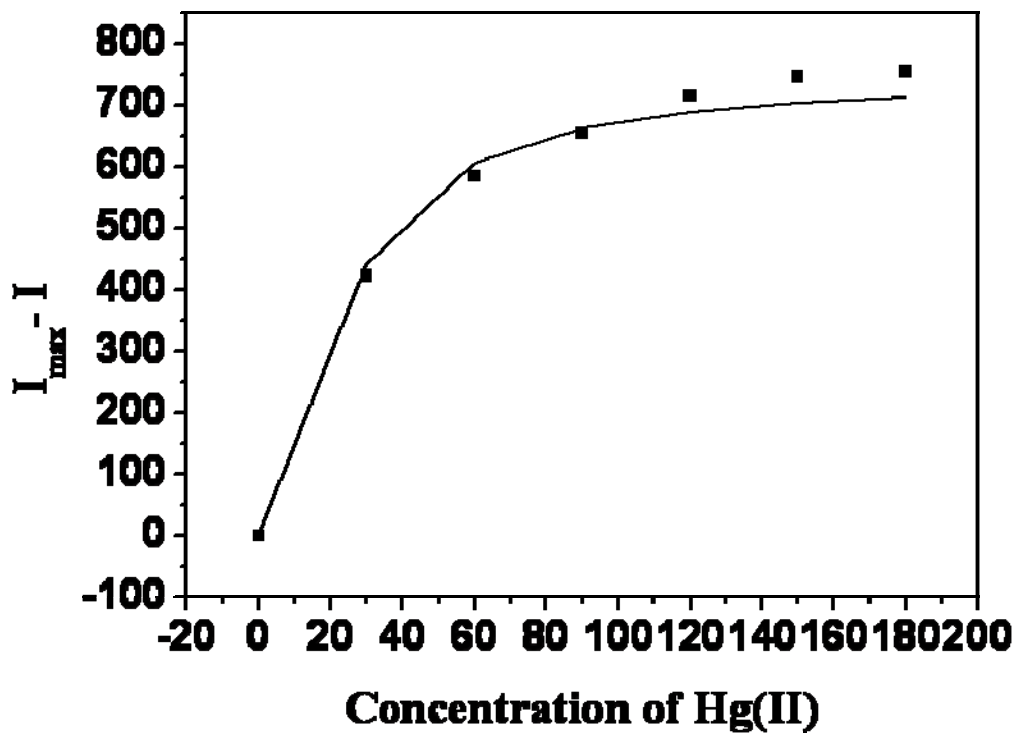

Figure S6. Titration curve with Hg(II) in 50% CH<sub>3</sub>CN/HEPES buffer solution and non-linear least square fitting by 1:1 complex model

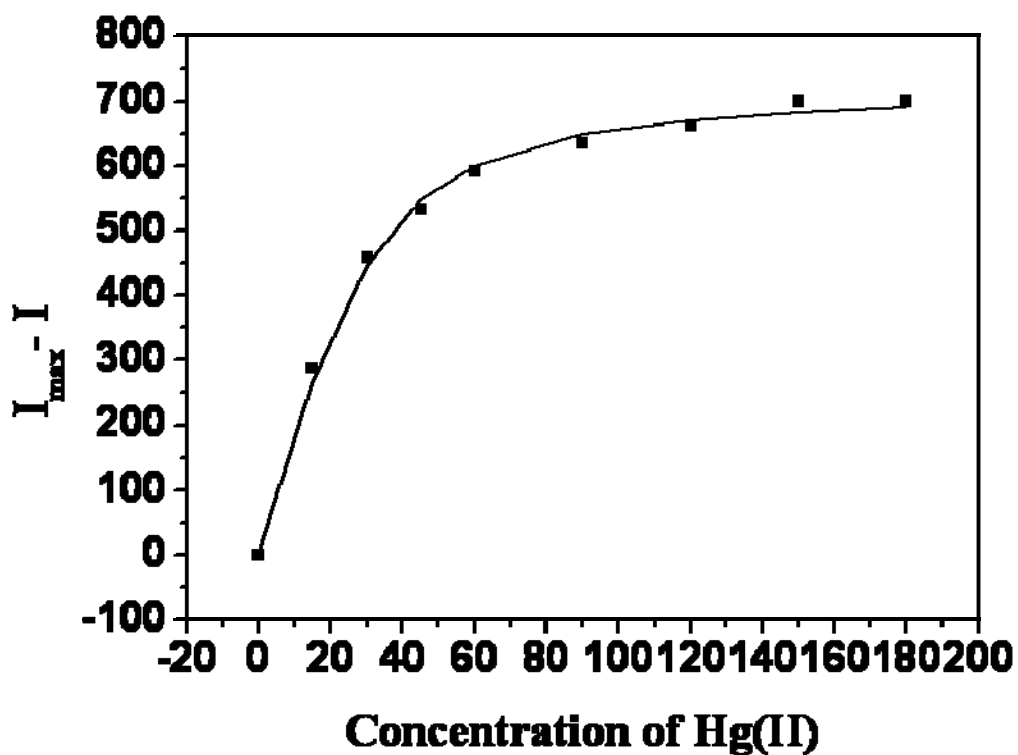

Figure S7. Titration curve with Hg(II) in 100% CH<sub>3</sub>CN and non-linear least square fitting by 1:1 complex model



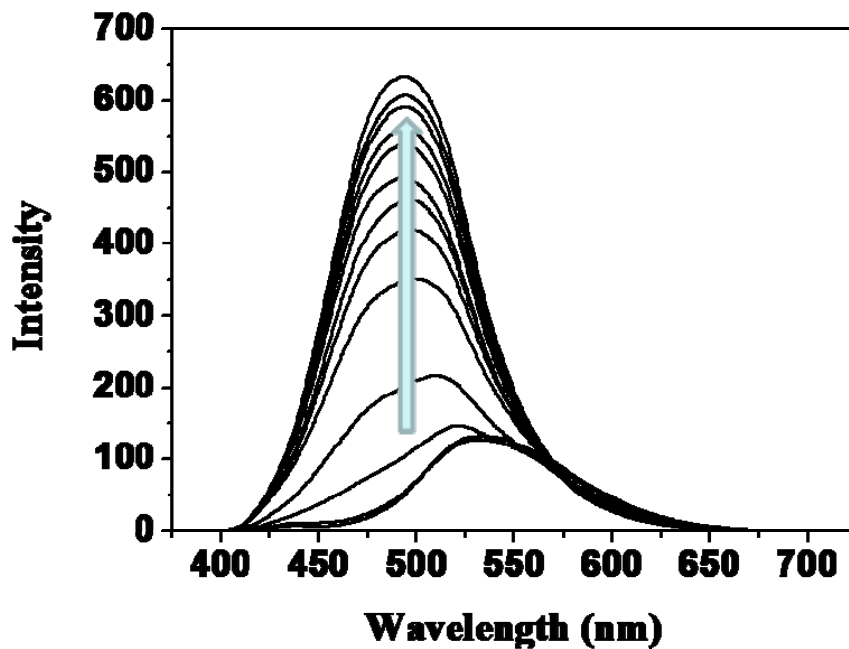

Figure S8. Emission spectra of **Dansyl-Met** (30 μM) in the presence of increasing concentration of Hg (II) in 10% CH<sub>3</sub>CN/HEPES buffer solution

(a)

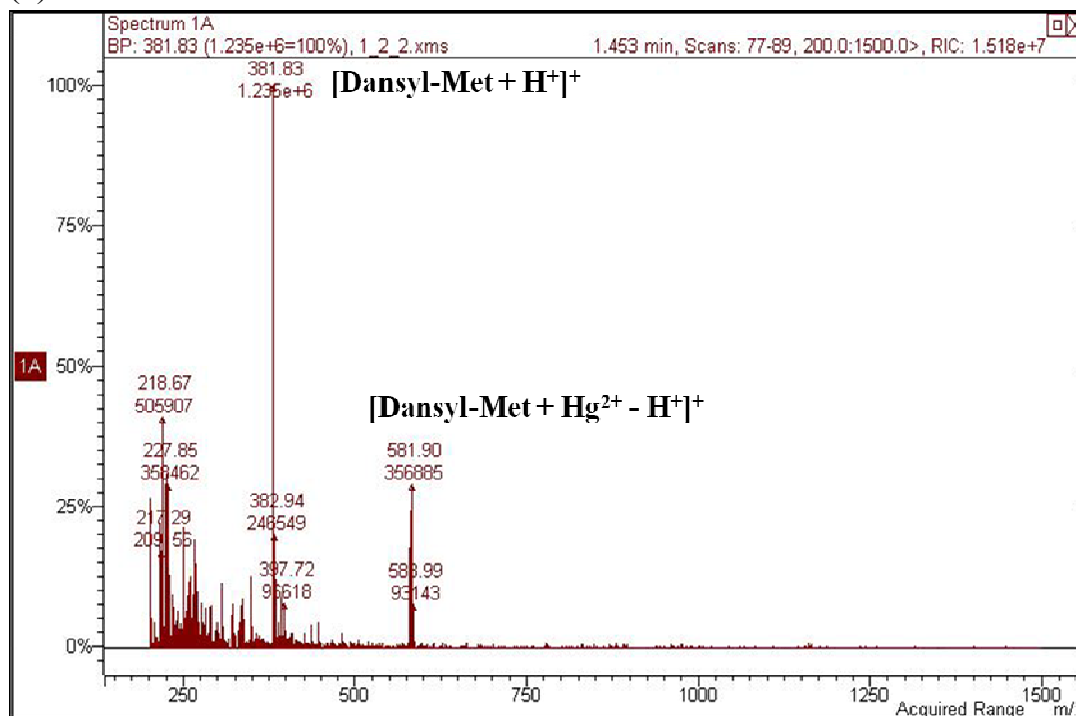

(b)

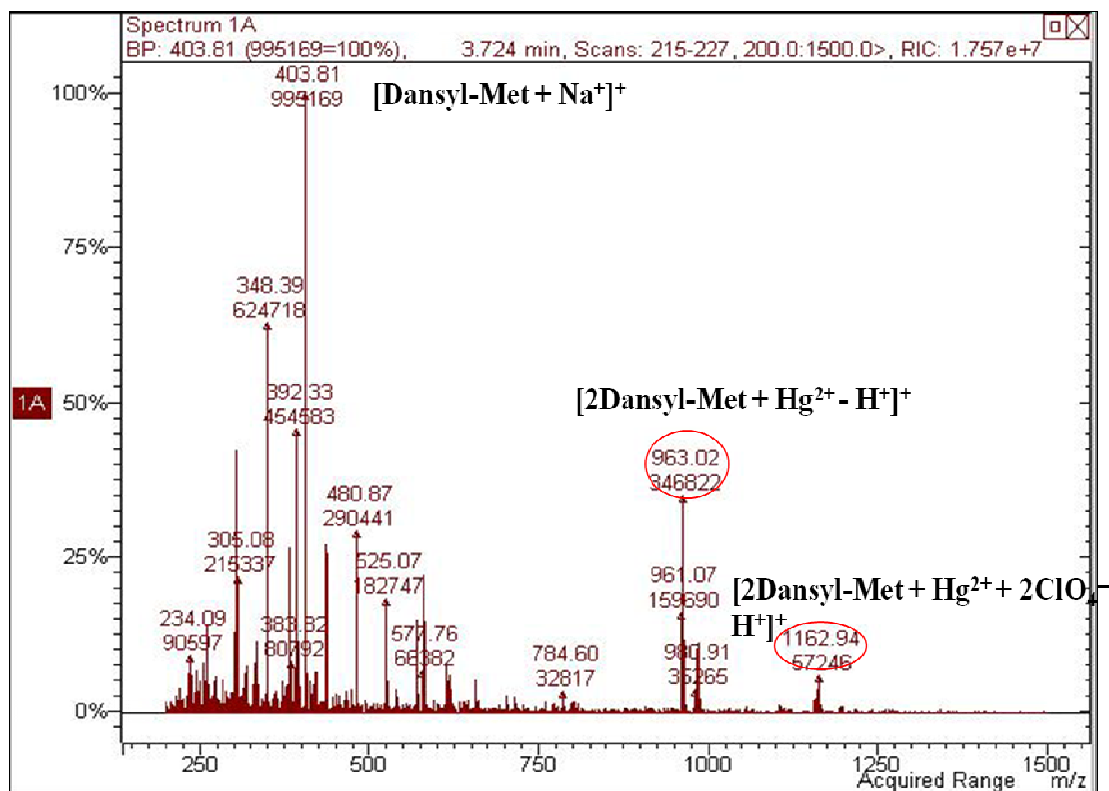

(c)

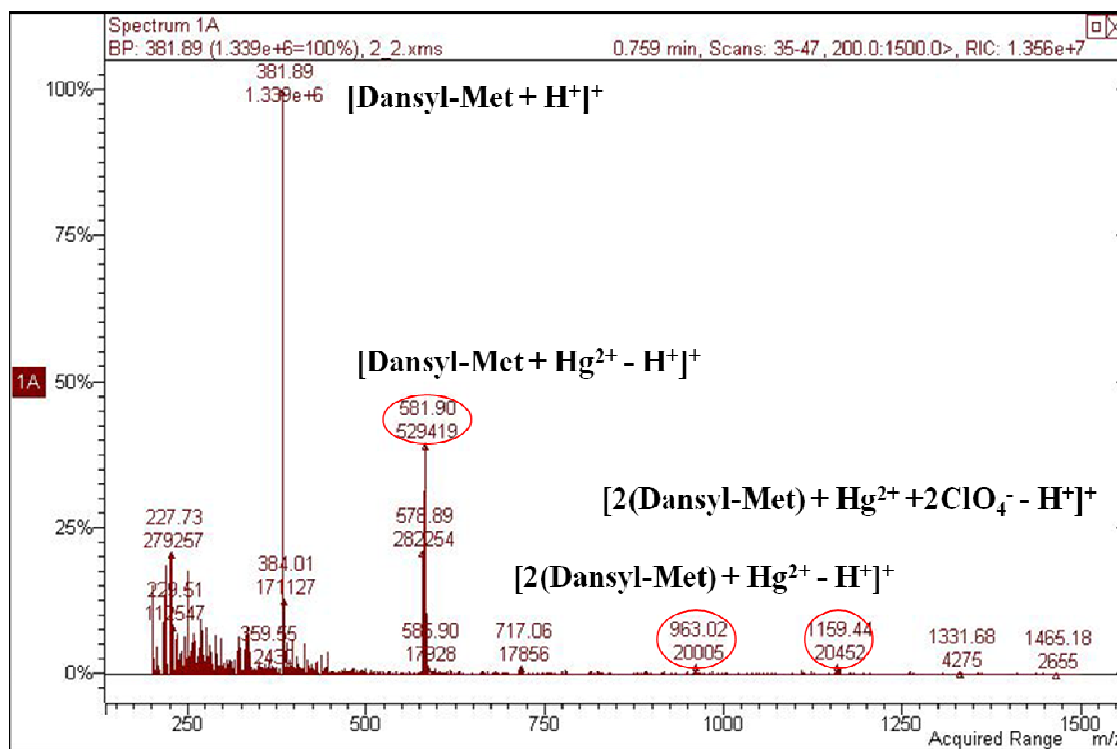

Figure S9. ESI mass spectra of **Dansyl-Met** (600  $\mu\text{M}$ ) in (a) 50%  $\text{CH}_3\text{CN}$ /HEPES buffer solution including 5 equiv. of  $\text{Hg}(\text{ClO}_4)_2$ , (b) 10%  $\text{CH}_3\text{CN}$ /HEPES buffer solution including 3 equiv. of  $\text{Hg}(\text{ClO}_4)_2$ , and (c) 10%  $\text{CH}_3\text{CN}$ /HEPES buffer solution including 0.1 equiv. of  $\text{Hg}(\text{ClO}_4)_2$ .

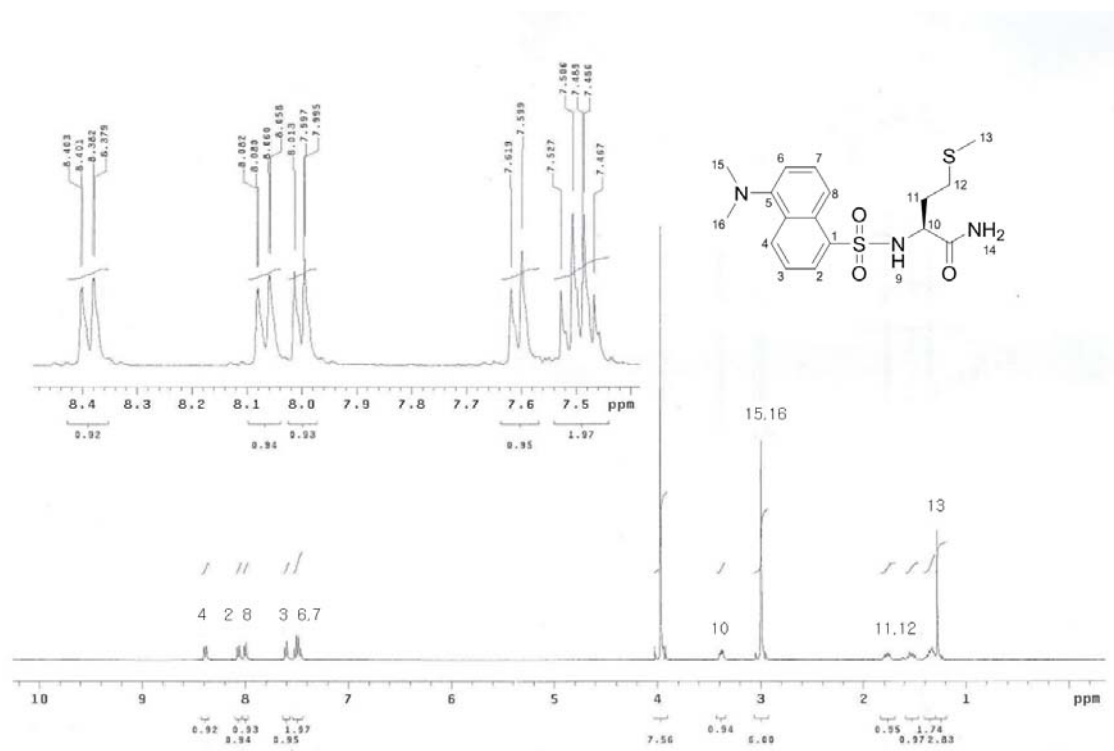

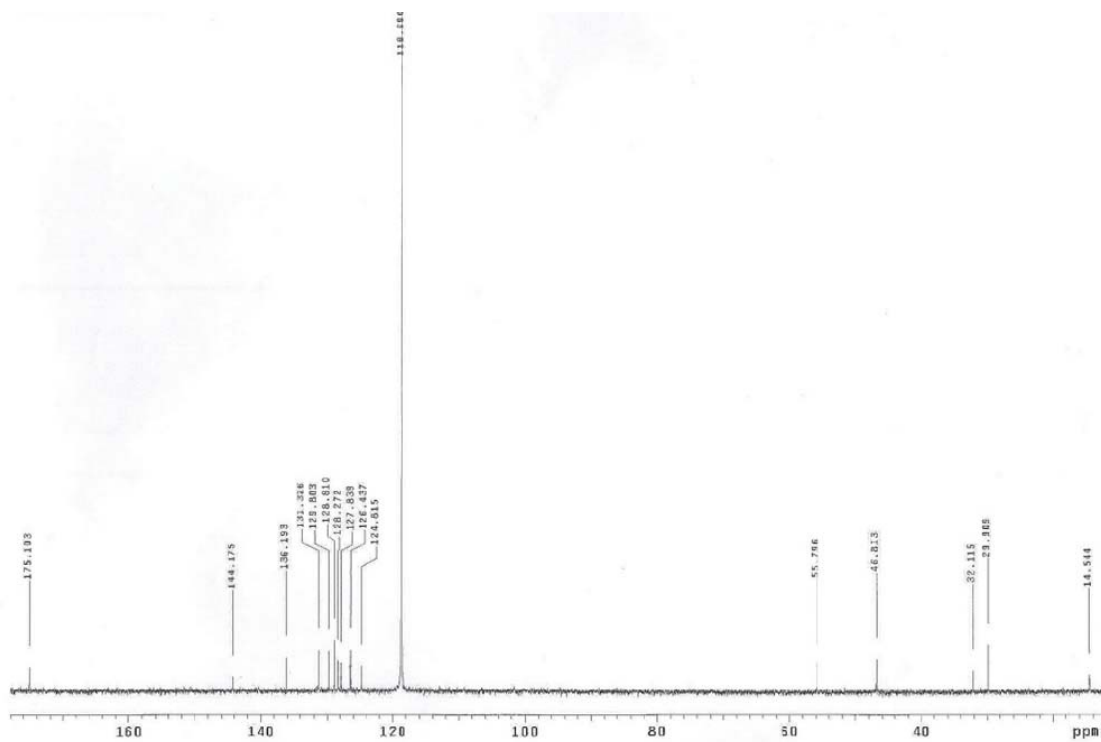

Figure S11.  $^{13}\text{C}$  NMR spectra for **Dansyl-Met** in  $\text{CD}_3\text{CN}/\text{D}_2\text{O}$  (1:1, v/v)

(a)

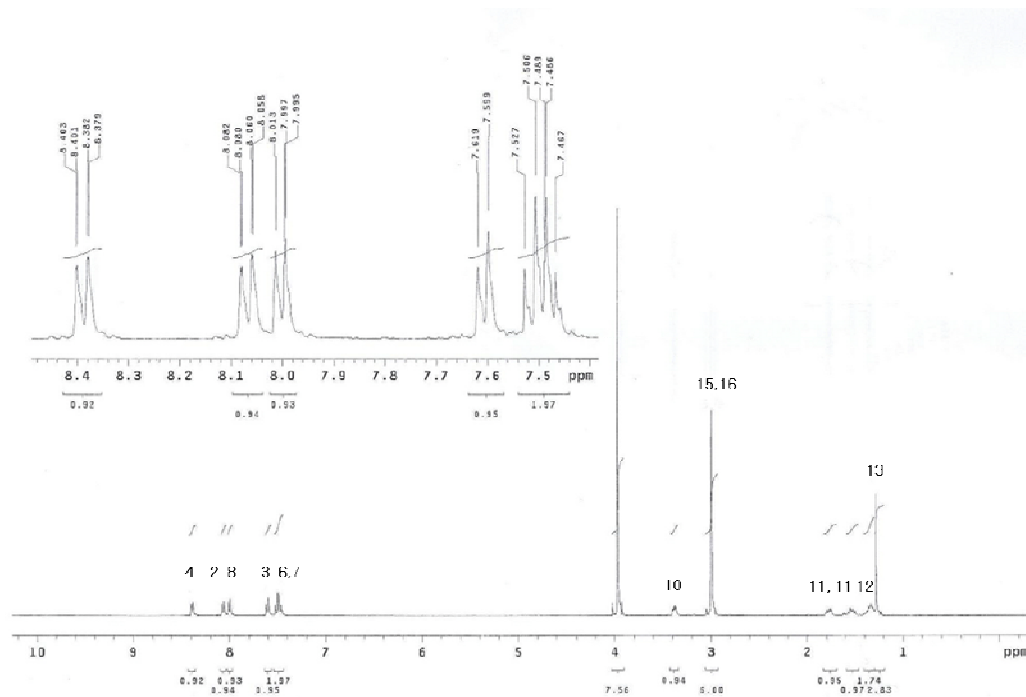

(b)

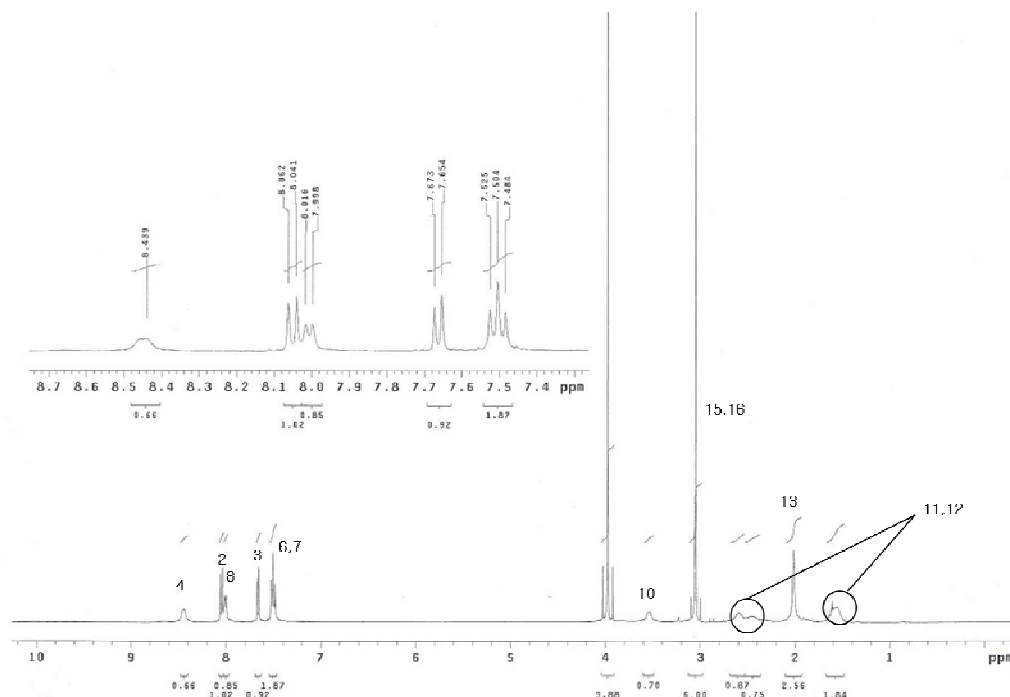

Figure S12. <sup>1</sup>H NMR (400 MHz) of **Dansyl-Met** (5.7 mM) in 50% CD<sub>3</sub>CN/D<sub>2</sub>O at 25 °C in the absence (a) and presence (b) of 3 equiv of Hg(ClO<sub>4</sub>)<sub>2</sub>.

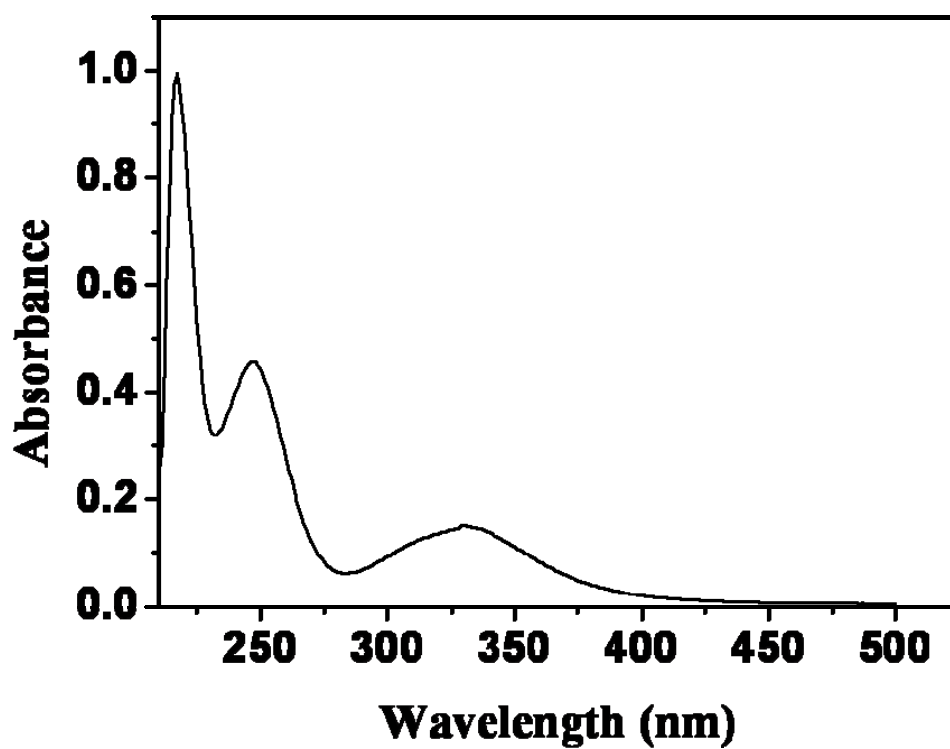

Figure S13. UV absorbance for **Dansyl-Met** (30  $\mu\text{M}$ ) in 10 mM HEPES buffer pH 7.4
